# Supplementary material for: School Water, Sanitation, and Hygiene, Soil-Transmitted Helminths, and Schistosomes: National Mapping in Ethiopia
Source: PLoS Negl Trop Dis. 2016 Mar 8;10(3):e0004515. doi: 10.1371/journal.pntd.0004515 (PMC4783033; doi:10.1371/journal.pntd.0004515)
Supplement: S1 Table — (XLSX) [file pntd.0004515.s005.xlsx]

## Sheet: Sheet1
Parasitology
	Median of school-level infection intensities (in EPG) in the included 1,645 schools	Median of school-level infection intensities (in EPG) in the excluded 530 schools	Mann-Whitney U	P value
S. mansoni	0	0	477810	< 0.0001
A. lumbricoides	20.18	12.77	423820	> 0.05
T. trichiura	0.96	0	390220	< 0.001
Hookworm	1.44	0	376900	< 0.0001
WASH
	Median score in the 1,645 included schools	Median score in the 231 excluded schools	Mann-Whitney U	P value
Water	0.00a	0.00b	142100	< 0.05
Sanitation	0.17c	0.07d	44437	< 0.0001
Hygiene	0.00e	0.00f	81344	> 0.05
NOTES
a Water scores were not calculable for 171 of the schools with parasitology data
b Water scores were not calculable for 20 of the schools without parasitology data
c Sanitation scores were not calculable for 481 of the schools with parasitology data
d Sanitation scores were not calculable for 119 of the schools without parasitology data
e Hygiene scores were not calculable for 332 of the schools with parasitology data
f Hygiene scores were not calculable for 107 of the schools without parasitology data
