# Supplementary material for: School Water, Sanitation, and Hygiene, Soil-Transmitted Helminths, and Schistosomes: National Mapping in Ethiopia
Source: PLoS Negl Trop Dis. 2016 Mar 8;10(3):e0004515. doi: 10.1371/journal.pntd.0004515 (PMC4783033; doi:10.1371/journal.pntd.0004515)
Supplement: S2 Table — (XLSX) [file pntd.0004515.s006.xlsx]

## Sheet: Sheet1
Water score (1,474 schools with parasitology data and water score)
Parasite	Number of schools with 0 prevalence	Number of schools with non-0 prevalence	Median score in schools with 0 prevalence	Median score in schools with non-0 prevalence	Mann-Whitney U	P value	Interpretation
S. mansoni	1152	322	0	0	190430	0.37	No significant difference in water scores between schools with some S. mansoni, and with no S. mansoni
Sanitation score (1,164 schools with parasitology data and sanitation score)
Parasite	Number of schools with 0 prevalence	Number of schools with non-0 prevalence	Median score in schools with 0 prevalence	Median score in schools with non-0 prevalence	Mann-Whitney U	P value	Interpretation
S. mansoni	895	269	0.17	0.15	128040	0.11	No significant difference in sanitation scores between schools with some S. mansoni, and with no S. mansoni
A. lumbricoides	288	876	0.19	0.16	138650	0.011	Schools with some A. lumbricoides had slightly worse sanitation scores (statistically significant)
T. trichiura	547	617	0.18	0.16	182290	0.018	Schools with some T. trichiura had slightly worse sanitation scores (statistically significant)
Hookworm	499	665	0.15	0.18	152410	0.017	Schools with some hookworm had better sanitation scores (statistically significant)
Hygiene score (1,313 schools with parasitology data and hygiene score)
Parasite	Number of schools with 0 prevalence	Number of schools with non-0 prevalence	Median score in schools with 0 prevalence	Median score in schools with non-0 prevalence	Mann-Whitney U	P value	Interpretation
A. lumbricoides	324	989	0	0	165860	0.091	No significant difference in hygiene scores between schools with some A. lumbricoides, and with no A. lumbricoides
T. trichiura	591	722	0	0	215740	0.53	No significant difference in hygiene scores between schools with some T. trichiura, and with no T. trichiura
Hookworm	549	764	0	0	203210	0.088	No significant difference in hygiene scores between schools with some hookworm, and with no hookworm
NOTES
Green interpretations represent zero-prevalence schools having significantly better WASH.
Red interpretations represent zero-prevalence schools having significantly worse WASH.
Black interpretations represent no significant difference in WASH scores between schools with and without each parasite.
